# Supplementary material
Source: publisher figshare collection journal article supplement (https://acs.figshare.com/ndownloader/files/3703843)
Supplement: Supplementary file 1 [file 3703843]

**Online Supporting Material for**  
**Techno-Economic Analysis of a Novel Indirect Coal-Biomass to Liquids Plant**  
**Integrated with a Combined Cycle Plant and CO<sub>2</sub> Capture and Storage**

**Yuan Jiang, Debangsu Bhattacharyya\***

Department of Chemical Engineering, West Virginia University, Morgantown, WV 26506, USA

Appendix A: Lists of major equipment in the indirect CBTL plant with CCS

Appendix B: Validation of the APEA model for the capital investment

## Appendix A. Lists of major equipment in the indirect CBTL plant with CCS

**Table S1** Detailed equipment list for the syngas production section and water treatment units

| Equipment                             | # Req | # Spares | Model in APEA | Cost source                 | Material    |
|---------------------------------------|-------|----------|---------------|-----------------------------|-------------|
| Biomass handling and drying           | 1     | 0        | C*            | Baliban et al. <sup>1</sup> | N/A         |
| Coal handling and drying              | 1     | 0        | C*            | Baliban et al. <sup>1</sup> | N/A         |
| Air separation unit                   | 1     | 0        | C*            | Baliban et al. <sup>1</sup> | N/A         |
| Gasifier (with steam generator)       | 1     | 0        | C*            | Baliban et al. <sup>1</sup> | N/A         |
| Slag separator                        | 1     | 0        | VT CYLINDER   | Aspen Icarus                | SS304       |
| Scrubber                              | 1     | 0        | VT CYLINDER   | Aspen Icarus                | CS          |
| Sour water gas shift reactor          | 1     | 0        | C*            | Baliban et al. <sup>1</sup> | N/A         |
| COS hydrolysis                        | 1     | 0        | C*            | Baliban et al. <sup>1</sup> | N/A         |
| Medium pressure steam generator       | 1     | 0        | HE WASTE HEAT | Icarus                      | CS          |
| Low pressure steam generator          | 2     | 0        | HE WASTE HEAT | Icarus                      | CS          |
| Hydrocarbons preheater                | 1     | 0        | HE FLOAT HEAD | Icarus                      | A285C, A214 |
| Boiler feed water heater              | 1     | 0        | HE FLOAT HEAD | Icarus                      | A285C, A214 |
| K.O. drum                             | 5     | 0        | VT CYLINDER   | Icarus                      | A516        |
| Fuel gas preheater                    | 1     | 0        | HE FLOAT HEAD | Icarus                      | A285C, A214 |
| Syngas cooler                         | 2     | 0        | HE FLOAT HEAD | Icarus                      | A285C, A214 |
| Makeup water heater                   | 1     | 0        | HE FLOAT HEAD | Icarus                      | A285C, A214 |
| Black water treatment                 | 1     | 0        | VT CYLINDER   | Icarus                      | A516        |
| Black water pump                      | 1     | 1        | CP CENTRIF    | Icarus                      | CS casing   |
| Makeup water pump                     | 1     | 1        | CP CENTRIF    | Icarus                      | CS casing   |
| Multi-stage O <sub>2</sub> compressor | 1     | 0        | GC CENTRIF    | Icarus                      | CS casing   |
| Slurry tank                           | 1     | 1        | AT MIXER      | Icarus                      | A285C       |
| Slurry water pump                     | 1     | 1        | CP CENTRIF    | Icarus                      | CS casing   |
| SWS - condenser                       | 1     | 0        | HE FIXED T S  | Icarus                      | A285C, A214 |
| SWS - drum                            | 1     | 0        | HT HORIZ DRUM | Icarus                      | A516        |
| SWS - reboiler                        | 1     | 0        | RB U TUBE     | Icarus                      | A285C, A214 |
| SWS - reflux pump                     | 1     | 1        | CP CENTRIF    | Icarus                      | CS casing   |
| SWS - tower                           | 1     | 0        | TW TRAYED     | Icarus                      | A516, A285C |
| SWS bottom pump                       | 1     | 1        | CP CENTRIF    | Icarus                      | CS casing   |
| Claus unit                            | 1     | 0        | C*            | Baliban et al. <sup>1</sup> | N/A         |
| Scrubber water pump                   | 1     | 1        | CP CENTRIF    | Aspen Icarus                | CS casing   |

\*Quoted equipment

SWS=sour water stripper

**Table S2** Detailed equipment list for the Selexol unit and the CO<sub>2</sub> compression unit

| Description         | # Req | # Spares | Model in APEA | Cost source | Material  |
|---------------------|-------|----------|---------------|-------------|-----------|
| Tail gas compressor | 1     | 1        | GC RECIP MOTR | Icarus      | CS casing |

|                                            |   |   |               |                     |              |
|--------------------------------------------|---|---|---------------|---------------------|--------------|
| NH <sub>3</sub> compressor                 | 1 | 0 | GC CENTRIF    | Icarus              | SS304        |
| CO <sub>2</sub> absorber                   | 1 | 0 | TW TRAYED     | Icarus              | A516, A285C  |
| Solvent chilling                           | 2 | 0 | HE FLOAT HEAT | Icarus              | A285C, A214  |
| Solvent pre-cooler                         | 1 | 0 | HE FLOAT HEAT | Icarus              | A285C, A214  |
| Solvent recycle pump                       | 1 | 1 | CP CENTRIF    | Icarus              | CS casing    |
| H <sub>2</sub> recovery drum               | 1 | 0 | VT CYLINDER   | Icarus              | A516         |
| H <sub>2</sub> recovery compressor         | 1 | 0 | GC CENTRIF    | Icarus              | SS316 casing |
| H <sub>2</sub> recovery cooler             | 1 | 0 | HE FLOAT HEAT | Icarus              | A285C, A214  |
| High pressure flash                        | 1 | 0 | VT CYLINDER   | Icarus              | A516         |
| Medium pressure flash                      | 1 | 0 | VT CYLINDER   | Icarus              | A516         |
| Low pressure flash                         | 1 | 0 | VT CYLINDER   | Icarus              | A516         |
| Rich solvent pump                          | 1 | 1 | CP CENTRIF    | Icarus              | CS casing    |
| H <sub>2</sub> S absorber solvent chilling | 1 | 0 | HE FLOAT HEAT | Icarus              | A285C, A214  |
| H <sub>2</sub> S absorber                  | 1 | 0 | TW TRAYED     | Icarus              | A516, A285C  |
| Lean solvent pre-cooler                    | 1 | 0 | HE FLOAT HEAT | Icarus              | A285C, A214  |
| H <sub>2</sub> S concentrator              | 1 | 0 | TW TRAYED     | Icarus              | A516, A285C  |
| H <sub>2</sub> S concentrator cooler       | 1 | 0 | HE FLOAT HEAT | Icarus              | A285C, A214  |
| Acid gas K.O. drum                         | 1 | 0 | VT CYLINDER   | Icarus              | A516         |
| Strippered gas compressor                  | 1 | 0 | GC CENTRIF    | Icarus              | CS casing    |
| Selexol stripper - top product pump        | 1 | 1 | CP CENTRIF    | Icarus              | CS casing    |
| Selexol stripper - condenser               | 1 | 0 | HE FIXED T S  | Icarus              | A285C, A214  |
| Selexol stripper - drum                    | 1 | 0 | HT HORIZ DRUM | Icarus              | A516         |
| Selexol stripper - reboiler                | 1 | 0 | RB U TUBE     | Icarus              | A516         |
| Selexol stripper - reflux pump             | 1 | 1 | CP CENTRIF    | Icarus              | CS casing    |
| Selexol stripper - tower                   | 1 | 0 | TW TRAYED     | Icarus              | A516, A285C  |
| Lean solvent pump                          | 1 | 1 | CP CENTRIF    | Icarus              | CS casing    |
| Lean solvent vessel                        | 1 | 0 | VT CYLINDER   | Icarus              | A516         |
| Makeup solvent pump                        | 1 | 1 | CP CENTRIF    | Icarus              | CS casing    |
| CO <sub>2</sub> compressor                 | 1 | 0 | C*            | NETL <sup>2,3</sup> | N/A          |

\*Quoted equipment

**Table S3** Detailed equipment list for the synfuel production and upgrading units

| Description                       | # Req | # Spares | Model in APEA | Cost source                 | Material    |
|-----------------------------------|-------|----------|---------------|-----------------------------|-------------|
| Fischer-Tropsch synthesis         | 1     | 0        | C*            | Bechtel <sup>4,5</sup>      | N/A         |
| Autothermal reformer              | 1     | 0        | C*            | Baliban et al. <sup>1</sup> | N/A         |
| Syncrude pump                     | 1     | 1        | CP CENTRIF    | Icarus                      | CS casing   |
| Hydrotreating feed furnace        | 1     | 0        | FU BOX        | Icarus                      | A213F       |
| Feed/product heat exchanger       | 1     | 0        | HE FLOAT HEAD | Icarus                      | A285C, A214 |
| Hydrotreating reactor             | 1     | 0        | VT MULTI WALL | Icarus                      | SS347       |
| Product cooler                    | 1     | 0        | HE FLOAT HEAD | Icarus                      | A285C, A214 |
| High pressure flash               | 1     | 0        | VT CYLINDER   | Icarus                      | A516        |
| H <sub>2</sub> recycle compressor | 1     | 0        | GC CENTRIF    | Icarus                      | SS316       |

|                                 |   |   |               |                          |             |
|---------------------------------|---|---|---------------|--------------------------|-------------|
| Low pressure flash              | 1 | 0 | VT CYLINDER   | Icarus                   | A516        |
| Heavy naphtha pumparound        | 1 | 0 | HE FLOAT HEAD | Icarus                   | A285C, A214 |
| Diesel pumparound               | 1 | 0 | HE FLOAT HEAD | Icarus                   | A285C, A214 |
| Heavy naphtha heat exchanger    | 1 | 0 | HE FLOAT HEAD | Icarus                   | A285C, A214 |
| Diesel heat exchanger           | 1 | 0 | HE FLOAT HEAD | Icarus                   | A285C, A214 |
| Wax heat exchanger              | 1 | 0 | HE FLOAT HEAD | Icarus                   | A285C, A214 |
| Main column - condenser         | 1 | 0 | HE FIXED T S  | Icarus                   | A285C, A214 |
| Main column - drum              | 1 | 0 | HT HORIZ DRUM | Icarus                   | A516        |
| Main column - reflux pump       | 1 | 1 | CP CENTRIF    | Icarus                   | CS casing   |
| Main column - tower             | 1 | 0 | TW TRAYED     | Icarus                   | A516, A285C |
| Main column - feed furnace      | 1 | 0 | FU BOX        | Icarus                   | A213C       |
| Side stripper - heavy naphtha   | 1 | 0 | TW TRAYED     | Icarus                   | A516, A285C |
| Side stripper - diesel          | 1 | 0 | TW TRAYED     | Icarus                   | A516, A285C |
| Pump to the stabilizer          | 1 | 1 | CP CENTRIF    | Icarus                   | CS casing   |
| Stabilizer - condenser          | 1 | 0 | HE FIXED T S  | Icarus                   | A285C, A214 |
| Stabilizer - drum               | 1 | 0 | HT HORIZ DRUM | Icarus                   | A516        |
| Stabilizer - reboiler           | 1 | 0 | RB U TUBE     | Icarus                   | A285C, A214 |
| stabilizer - reflux pump        | 1 | 1 | CP CENTRIF    | Icarus                   | CS casing   |
| Stabilizer - tower              | 1 | 0 | TW TRAYED     | Icarus                   | A516, A285C |
| Hydrocracking                   | 1 | 0 | C*            | Shah et al. <sup>6</sup> | N/A         |
| Isomerization                   | 1 | 0 | C*            | Bechtel <sup>4,5</sup>   | N/A         |
| Catalytic reformer              | 1 | 0 | C*            | Bechtel <sup>4,5</sup>   | N/A         |
| H <sub>2</sub> recovery (PSA)   | 1 | 0 | C*            | Bechtel <sup>4,5</sup>   | N/A         |
| Diesel storage tank (30 days)   | 1 | 0 | VT STORAGE    | Icarus                   | A285C       |
| Gasoline storage tank (30 days) | 1 | 0 | VT STORAGE    | Icarus                   | A285C       |

\*Quoted equipment

**Table S4** Detailed equipment list for the post-FT CO<sub>2</sub> capture unit

| Description                        | # Req | # Spares | Model in APEA | Cost source | MOC            |
|------------------------------------|-------|----------|---------------|-------------|----------------|
| Treated gas K.O. drum*             | 1     | 0        | VT CYLINDER   | Icarus      | A516           |
| Feed gas K.O. drum*                | 1     | 0        | VT CYLINDER   | Icarus      | SS304          |
| Activated carbon drum*             | 1     | 0        | VT CYLINDER   | Icarus      | A516           |
| Rich amine flash drum*             | 1     | 0        | HT HORIZ DRUM | Icarus      | A516           |
| Absorber                           | 1     | 0        | TW PACKED     | Icarus      | A516**, M107YC |
| Absorber intercooling              | 1     | 0        | HE FLOAT HEAD | Icarus      | A285C, A214    |
| Lean/rich heat exchanger           | 4     | 0        | HE PLAT FRAM  | Icarus      | SS316          |
| Solvent regeneration - condenser   | 2     | 0        | HE FIXED T S  | Icarus      | T150A, SS316   |
| Solvent regeneration - drum        | 2     | 0        | HT HORIZ DRUM | Icarus      | A516           |
| Solvent regeneration - reboiler    | 8     | 0        | RB U TUBE     | Icarus      | 316LW, SS316   |
| Solvent regeneration - reflux pump | 2     | 2        | CP CENTRIF    | Icarus      | SS316          |
| Solvent regeneration - tower       | 2     | 0        | TW PACKED     | Icarus      | 304L, M107YC   |
| Solvent cooling                    | 1     | 0        | HE FLOAT HEAD | Icarus      | A285C, A214    |

|                      |   |   |            |        |       |
|----------------------|---|---|------------|--------|-------|
| Solvent recycle pump | 1 | 1 | CP CENTRIF | Icarus | SS316 |
| Amine storage tank * | 1 | 0 | VT STORAGE | Icarus | A285C |

\*sizing information available in Bechtel's report<sup>18</sup>

\*\*With 1/8 inch SS304 cladding

**Table S5** Detailed equipment list for the combined cycle power plant\*

| Description                      | # Req | # Spares | Model in APEA | Cost source         | Material    |
|----------------------------------|-------|----------|---------------|---------------------|-------------|
| Clean fuel gas heater            | 1     | 0        | HE FLOAT HEAD | Icarus              | A258C, A214 |
| Fuel gas compressor              | 1     | 0        | GC CENTRIF    | Icarus              | CS Casing   |
| Gas turbine                      | 1     | 0        | C*            | NETL <sup>2,3</sup> | N/A         |
| Boiler feed water pump           | 1     | 1        | CP CENTRIF    | Icarus              | CS Casing   |
| Medium pressure steam reheater   | 1     | 0        | HE AIR COOLER | Icarus              | A214        |
| High pressure steam superheater  | 1     | 0        | HE AIR COOLER | Icarus              | A214        |
| High pressure steam generator    | 1     | 0        | HE WASTE HEAT | Icarus              | CS          |
| High pressure BFW economizer     | 1     | 0        | HE AIR COOLER | Icarus              | A214        |
| High pressure steam blowdown     | 1     | 0        | VT CYLINDER   | Icarus              | CS          |
| Low pressure steam generator     | 1     | 0        | HE WASTE HEAT | Icarus              | CS          |
| Low pressure BFW economizer      | 1     | 0        | HE AIR COOLER | Icarus              | A214        |
| High pressure BFW pre-economizer | 1     | 0        | HE AIR COOLER | Icarus              | A214        |
| Pre-deaerator heater             | 1     | 0        | HE AIR COOLER | Icarus              | A214        |
| Deaerator                        | 1     | 0        | TW TRAYED     | Icarus              | A516, A285C |
| Steam packing exhauster          | 1     | 0        | HE FLOAT HEAD | Icarus              | A516, A285C |
| Air ejector                      | 1     | 0        | HE FLOAT HEAD | Icarus              | A516, A285C |
| Condenser pump                   | 1     | 1        | VP MECH BOOST | Icarus              | CS Casing   |
| Surface condenser                | 1     | 0        | C BAROMETRIC  | Icarus              | N/A         |
| Steam turbine                    | 1     | 0        | EG TURBO GEN  | Icarus              | CS Casing   |
| High pressure BFW pump           | 1     | 1        | CP CENTRIF    | Icarus              | CS Casing   |
| Medium pressure BFW pump         | 1     | 1        | CP CENTRIF    | Icarus              | CS Casing   |
| Low pressure BFW pump            | 1     | 1        | CP CENTRIF    | Icarus              | CS Casing   |

\*Quoted equipment

BFW= boiler feed water

## Reference (for Appendix A)

(1) Baliban, R.C.; Elia, J.A.; Floudas, C.A. Optimization framework for the simultaneous process synthesis, heat and power integration of a thermochemical hybrid biomass, coal and natural gas facility. *Compt. Chem. Eng.* **2011**, *35*, 1647-1690.

(2) *Baseline Technical and Economic Assessment of a Commercial Scale Fischer-Tropsch Liquids Facility*; DOE/NETL-2007/1260; National Energy Technology Laboratory, 2007; <http://www.netl.doe.gov>.

(3) *Technical and Economic Assessment of Small-Scale Fischer-Tropsch Liquids Facilities*; DOE/NETL-2007/1253; National Energy Technology Laboratory, 2007; <http://www.netl.doe.gov>.

(4) *Baseline Design/Economics for Advanced Fischer-Tropsch Technology, Final Report*; DE-AC22-91PC90027; Bechtel Corp., April 1998; <http://www.fischer-tropsch.org>.

(5) *Aspen Process Flowsheet Simulation Model for a Battelle Biomass-Based Gasification, Fischer-Tropsch Liquefaction and Combined-Cycle Power Plant*, Topical Report; DE-AC22-93PC91029; Bechtel Corp., May 1998; <http://www.fischer-tropsch.org>.

(6) Shah, P.P.; Sturtevant, G.C.; Gregor, J. H.; Humbach, M.J.; Padra, F.G.; Steigleder, K.Z. *Fischer-Tropsch Wax Characterization and Upgrading, Final Report*; DE-AC22-85PC80017; UOP Inc., June 1988; <http://www.fischer-tropsch.org>.

## Appendix B. Validation of the APEA model for the capital investment

**Table S6** Comparison with Bechtel studies<sup>1</sup>

|                        |                                              | Bechtel*     | Model  | Difference | Notes |
|------------------------|----------------------------------------------|--------------|--------|------------|-------|
|                        |                                              | (MM\$, 2014) |        | %          |       |
| ISBL cost of each unit |                                              |              |        |            | (1)   |
| Unit 100               | Syngas production and treatment              | 2056.6       | 2280.4 | -10.88     |       |
|                        | Pre-processing & gasification                | 1355.7       | 1266.8 | 6.56       |       |
|                        | Syngas treating & cooling                    | 60.8         | 63.4   | -4.26      |       |
|                        | Sour water stripper                          | 5.1          | 4.9    | 5.33       |       |
|                        | Acid gas removal                             | 29.9         | 299.6  |            | (2)   |
|                        | Sulfur recovery                              | 69.5         | 70.0   | -0.77      |       |
|                        | Syngas wet scrubbing                         | 12.1         | 13.3   | -9.75      |       |
|                        | Air separation unit                          | 523.5        | 422.3  | 19.34      |       |
|                        | Ash handling                                 |              | 140.1  |            | (3)   |
| Unit 200               | Fischer-Tropsch synthesis loop               | 800.2        | 437.3  | 45.35      | (4)   |
|                        | Fischer-Tropsch synthesis                    | 352.8        | 326.0  | 7.61       |       |
|                        | Carbon dioxide removal                       | 226.7        | 60.6   | -6.93**    | (5)   |
|                        | Dehydration and hydrocarbon recovery         | 114.5        | 3.0    |            |       |
|                        | Autothermal reformer                         | 35.1         | 35.0   | -0.35      |       |
|                        | Hydrogen recovery                            | 71.1         | 15.8   |            | (6)   |
| Unit 300               | Product upgrading and refining               | 243.7        | 190.5  | 21.83      | (7)   |
|                        | Wax hydrocracking                            | 69.8         | 65.9   | 5.63       |       |
|                        | Hydrotreating                                | 33.0         | 30.6   | 7.3        |       |
|                        | Catalytic reforming                          | 50.2         | 46.4   | 7.66       |       |
|                        | C <sub>5</sub> /C <sub>6</sub> isomerization | 11.7         | 13.4   | -14.63     |       |
|                        | C <sub>4</sub> isomerization and alkylation  | 70.2         |        |            |       |
|                        | Others                                       | 8.9          |        |            | (8)   |
| Total ISBL cost        |                                              | 3100.5       | 2883.0 | 5.91       |       |
| Total project cost***  |                                              | 4748.5       | 4905.6 | -3.31      | (9)   |

\*Original data reported in 1998 is escalated to 2014 pricing basis using CEPCI.

\*\*Difference in capital investment for same amount of CO<sub>2</sub> capture

\*\*\* TPC includes OSBL, engineering cost, contingency cost.

(1) HRSG section with steam turbine is included in OSBL section in Bechtel's analysis.

(2) In Bechtel's baseline design, CCS is not considered; amine solvent is used in the acid gas removal unit for removing H<sub>2</sub>S only in Unit 100.

(3) Ash handling system is considered as OSBL facility in Bechtel's baseline design.

(4) Dehydration unit was considered in Bechtel's design but not in this project. More complicated hydrocarbon recovery unit is considered in Bechtel's design

(5) In Bechtel's baseline design, CCS is not considered. Hence, most of the CO<sub>2</sub> is captured by the post FT CO<sub>2</sub> capture unit in Unit 200. However, in the base case of this study, WGS reactor is used to increase the H<sub>2</sub>/CO ratio in the FT inlet. As a result, significant amount of CO<sub>2</sub> is captured in the acid gas removal unit instead of the post-FT CO<sub>2</sub> removal unit.

(6) The capital cost estimate is consistent with the recent data released by NETL for hydrogen production plant.<sup>4</sup>

(7) C<sub>4</sub> isomerization & C<sub>3</sub>-C<sub>5</sub> alkylation units are considered in Bechtel's design for upgrading light hydrocarbons to gasoline but these units are not considered in this project.

(8) Saturated gas plant considered by Bechtel is not considered in this project because light gases are used in furnace and gas turbine in this project instead of upgraded into gasoline in Bechtel's design.

(9) The OSBL cost is expected to be higher in this project because more electricity produced.

**Table S7** Comparison with NETL's study on large scale CTL plant<sup>2</sup>

|                                |                                 | NETL*        | Model  | Difference | Notes |
|--------------------------------|---------------------------------|--------------|--------|------------|-------|
|                                |                                 | (MM\$, 2014) |        | %          |       |
| Bare erected cost of each unit |                                 |              |        |            |       |
| Unit 100                       | Syngas production and treatment | 1562.7       | 1543.6 | 1.22       |       |
|                                | Preprocessing                   | 295.2        | 316.3  | -7.13      |       |
|                                | Gasifier & accessories          | 936.7        | 857.8  | 8.42       |       |
|                                | Air separation unit             | 330.7        | 369.5  | -11.72     |       |
| Unit 200                       | Gas cleanup                     | 420.1        | 420.9  | -0.19      | (1)   |
| Unit 300                       | Fuel production and upgrading   | 480.9        | 561.4  | -13.91     |       |
|                                | without naphtha upgrading       | 480.9        | 466.9  | 2.91       | (2)   |
| Unit 400                       | OSBL facilities                 | 383.8        | 441.4  | 15.03      |       |
|                                | Gas turbine & accessories       | 84.1         | 86.3   | -2.56      |       |
|                                | HRSB & steam turbine            | 117.7        | 87.5   | 25.68      | (3)   |
|                                | Cooling water system            | 42.0         | 75.2   |            | (4)   |
|                                | Slag disposal                   | 139.9        | 192.5  |            |       |
| Total bare erected cost        |                                 | 2847.4       | 2970.8 | -4.33      |       |
| Total project cost**           |                                 | 5214.3       | 5137.6 | 1.47       | (5)   |

\*Original data reported in 2007 is escalated to 2014 pricing basis using CEPCI.

\*\*TPC includes OSBL, engineering cost, contingency cost.

(1) Dual-stage Selexol unit is used for pre-FT CO<sub>2</sub> removal in NETL's design, which is the same as the base case of this project.

(2) Catalytic reforming & C<sub>5</sub>/C<sub>6</sub> isomerization units for naphtha upgrading are not considered in NETL's study but these units are considered in this study.

(3) Difference in power output

(4) Cost of the cooling water distribution system is included in APEA model but not in NETL's case study. Relative error is 12.59% if the cooling water distribution is not considered in this case.

(5) Additional 25% of process contingency is considered for FTS in NETL's study.

**Table S8** Comparison with NETL's study on small scale CTL plant<sup>3</sup>

|                                |                                 | NETL*        | Model | Difference | Notes |
|--------------------------------|---------------------------------|--------------|-------|------------|-------|
|                                |                                 | (MM\$, 2014) |       | %          |       |
| Bare erected cost of each unit |                                 |              |       |            |       |
| Unit 100                       | Syngas production and treatment | 372.5        | 377.7 | -1.38      |       |
|                                | Preprocessing                   | 60.0         | 52.4  | 12.7       |       |
|                                | Gasifier & accessories          | 234.3        | 221.0 | 5.68       |       |
|                                | Air separation unit             | 78.1         | 104.2 |            |       |



|                         |                               |        |        |        |     |
|-------------------------|-------------------------------|--------|--------|--------|-----|
| Unit 200                | Gas cleanup                   | 84.9   | 173.6  |        | (1) |
| Unit 300                | Fuel production and upgrading | 89.4   | 151.1  |        | (2) |
| Unit 400                | OSBL facilities               | 79.5   | 82.4   | 3.73   |     |
|                         | Gas turbine & accessories     | 16.7   | 20.4   |        | (3) |
|                         | HRSG & steam turbine          | 25.7   | 21.9   |        |     |
|                         | Cooling water system          | 8.4    | 14.8   |        | (4) |
|                         | Slag disposal                 | 28.6   | 25.4   | 11.38  |     |
| Total bare erected cost |                               | 658.0  | 784.7  | -24.96 |     |
| Total project cost**    |                               | 1124.1 | 1185.2 | -5.44  | (5) |

\*Original data reported in 2007 is escalated to 2014 pricing basis using CEPCI.

\*\* TPC includes OSBL, engineering cost, contingency cost.

(1) CCS is not considered in NETL's design; Area 200 is only for H<sub>2</sub>S removal in NETL's study on the small-scale plant.

(2) CCS, catalytic reforming and C<sub>5</sub>/C<sub>6</sub> isomerization units are not considered in NETL's study but these units are considered in this study.

(3) Difference in power output

(4) Cost of the cooling water distribution system is included in APEA model but not included in NETL's case study.

(5) Additional 25% process contingency is considered for FTS in NETL's study.

## Reference (for Appendix B)

(1) *Baseline Design/Economics for Advanced Fischer-Tropsch Technology, Final Report*; DE-AC22-91PC90027; Bechtel Corp., April 1998; <http://www.fischer-tropsch.org>.

(2) *Baseline Technical and Economic Assessment of a Commercial Scale Fischer-Tropsch Liquids Facility*; DOE/NETL-2007/1260; National Energy Technology Laboratory, 2007; <http://www.netl.doe.gov>.

(3) *Technical and Economic Assessment of Small-Scale Fischer-Tropsch Liquids Facilities*; DOE/NETL-2007/1253; National Energy Technology Laboratory, 2007; <http://www.netl.doe.gov>.

(4) *Production of High Purity Hydrogen from Domestic Coal: Assessing the Techno-Economic Impact of Emerging Technologies*; DOE/NETL-2010/1432; National Energy Technology Laboratory, 2010; <http://www.netl.doe.gov>.
